# Supplementary material for: Interactive webtool for analyzing drug sensitivity and resistance associated with genetic signatures of cancer cell lines
Source: PubMed Central journal article supplement (PMC10356876; doi:10.1007/s00432-022-04503-2), 2022-12-06
Supplement: 432_2022_4503_MOESM1_ESM.pdf [file 432_2022_4503_MOESM1_ESM.pdf]

# How to retrieve the alterations\_across\_samples.tsv file for your analysis

→ go to <https://www.cbioportal.org/>

**1. Select data set: Cancer Cell Line Encyclopedia (Broad, 2019)**

**2. Click "Query By Gene"**

**3. Select alteration types which should be included in your analysis**

**4. Select Case Set**

**5. Enter your genes of interest**

**6. Click "Submit Query"**

**3. Select alteration types which should be included in your analysis**

**4. Select Case Set**

**5. Enter your genes of interest**

**6. Click "Submit Query"**

**Supplementary Figure 1.** Step-by-spec guide how to retrieve the 'alterations\_across\_samples.tsv' file from <https://www.cbioportal.org/> part 1. After selecting the Cancer Cell Line Encyclopedia (Broad, 2019), click 'Query by Gene'. On the following page genomic alteration types can be chosen and genes of interest entered.

7. Click "Download"

Modify Query Cancer Cell Line Encyclopedia (Broad, 2019) Queried genes are altered in 656 (38%) of queried patients/samples  
 All samples (1739 patients/samples) - BRAF, MAP2 & PTEN

OncoPrint Cancer Types Summary Mutual Exclusivity Plots Mutations Co-expression Comparison CN Segments Pathways Download

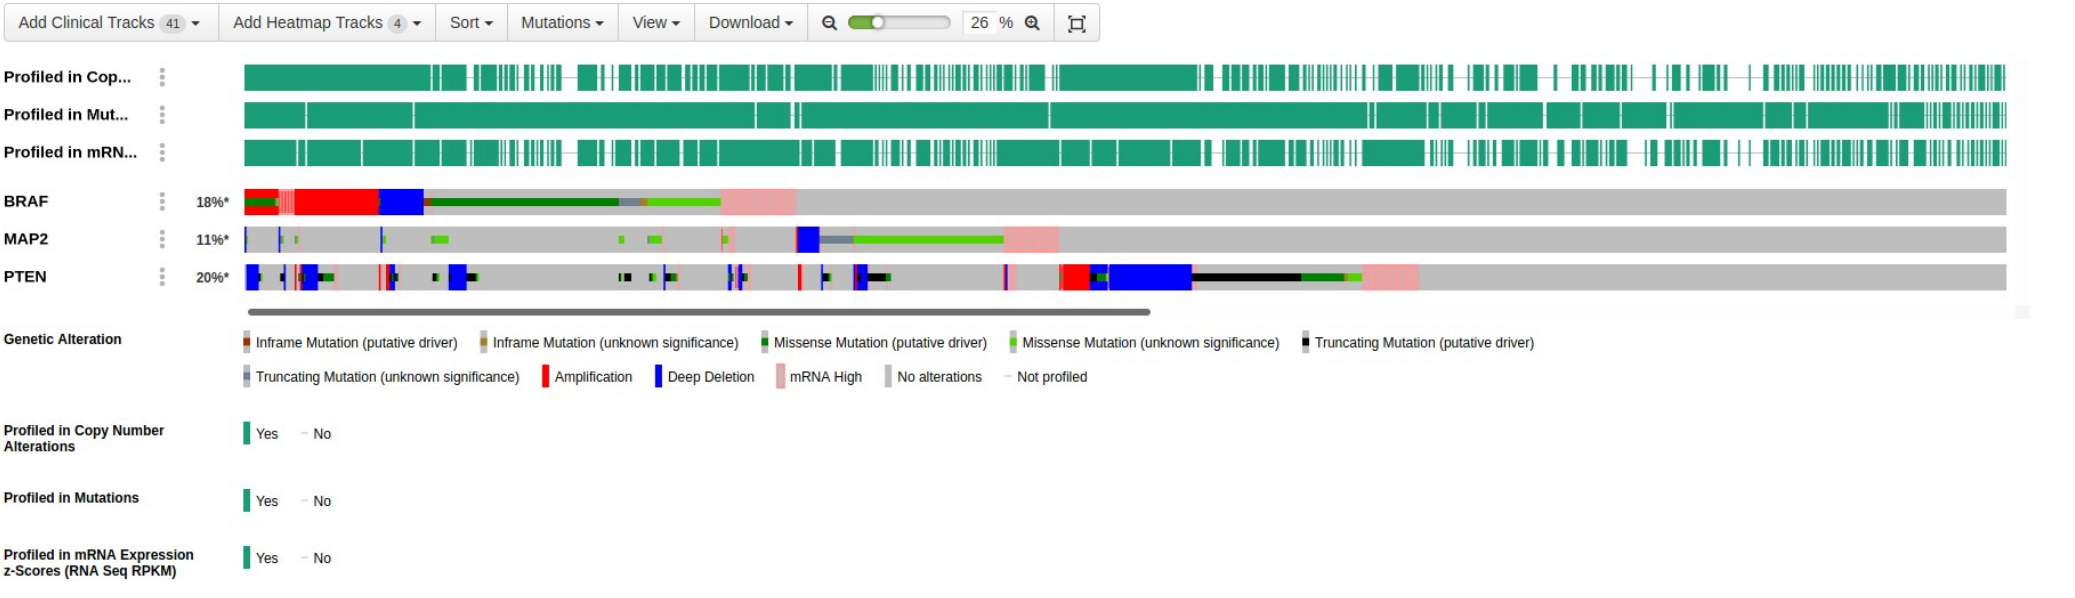

Download

Downloadable Data Files

|                                                                    |                                          |
|--------------------------------------------------------------------|------------------------------------------|
| Copy-number Alterations (OQL is not in effect)                     | Tab Delimited Format   Transposed Matrix |
| Mutations (OQL is not in effect)                                   | Tab Delimited Format   Transposed Matrix |
| mRNA Expression z-Scores (RNA Seq RPKM)                            | Tab Delimited Format   Transposed Matrix |
| Altered samples: List of samples with alterations                  | Copy   Download   Query   Virtual Study  |
| Unaltered samples: List of samples without any alteration          | Copy   Download   Query   Virtual Study  |
| Sample matrix: List of all samples where 1=altered and 0=unaltered | Copy   Download                          |
| mRNA expression (RNA-Seq RPKM)                                     | Tab Delimited Format   Transposed Matrix |
| Treatment response: IC50                                           | Tab Delimited Format   Transposed Matrix |
| Treatment response: Z-score of IC50                                | Tab Delimited Format   Transposed Matrix |
| Treatment response: AUC                                            | Tab Delimited Format   Transposed Matrix |

Gene Alteration Frequency

| Gene Symbol | Num Samples Altered | Percent Samples Altered |
|-------------|---------------------|-------------------------|
| PTEN        | 335                 | 20.1%                   |
| BRAF        | 308                 | 18.5%                   |
| MAP2        | 188                 | 11.3%                   |

Showing 1-3 of 3

7. Download .tsv file

Type of Genetic Alterations Across All Samples

| Study ID       | Sample ID                               | Patient ID                              | Altered | BRAF          | MAP2          | PTEN          |
|----------------|-----------------------------------------|-----------------------------------------|---------|---------------|---------------|---------------|
| ccl_broad_2019 | NCIH1694_LUNG                           | NCIH1694_LUNG                           | 1       | HIGH          | AMP, HIGH     | no alteration |
| ccl_broad_2019 | P3HR1_HAEMATPOIETIC_AND_LYMPHOID_TISSUE | P3HR1_HAEMATPOIETIC_AND_LYMPHOID_TISSUE | 1       | no alteration | no alteration | HIGH, Q17*    |
| ccl_broad_2019 | HUT78_HAEMATPOIETIC_AND_LYMPHOID_TISSUE | HUT78_HAEMATPOIETIC_AND_LYMPHOID_TISSUE | 1       | no alteration | no alteration | HOMDEL        |
| ccl_broad_2019 | UMUC3_URINARY_TRACT                     | UMUC3_URINARY_TRACT                     | 1       | no alteration | no alteration | HOMDEL        |
| ccl_broad_2019 | HOS_BONE                                | HOS_BONE                                | 1       | HOMDEL        | no alteration | no alteration |

**Supplementary Figure 2.** Step-by-spec guide how to retrieve the 'alterations\_across\_samples.tsv' file from cBioPortal part 2. Under the last tab 'Download', the section 'Type of Genomic Alterations Across All Samples' can be found and the 'alterations\_across\_samples.tsv' file can be downloaded with the cloud symbol on the right site.

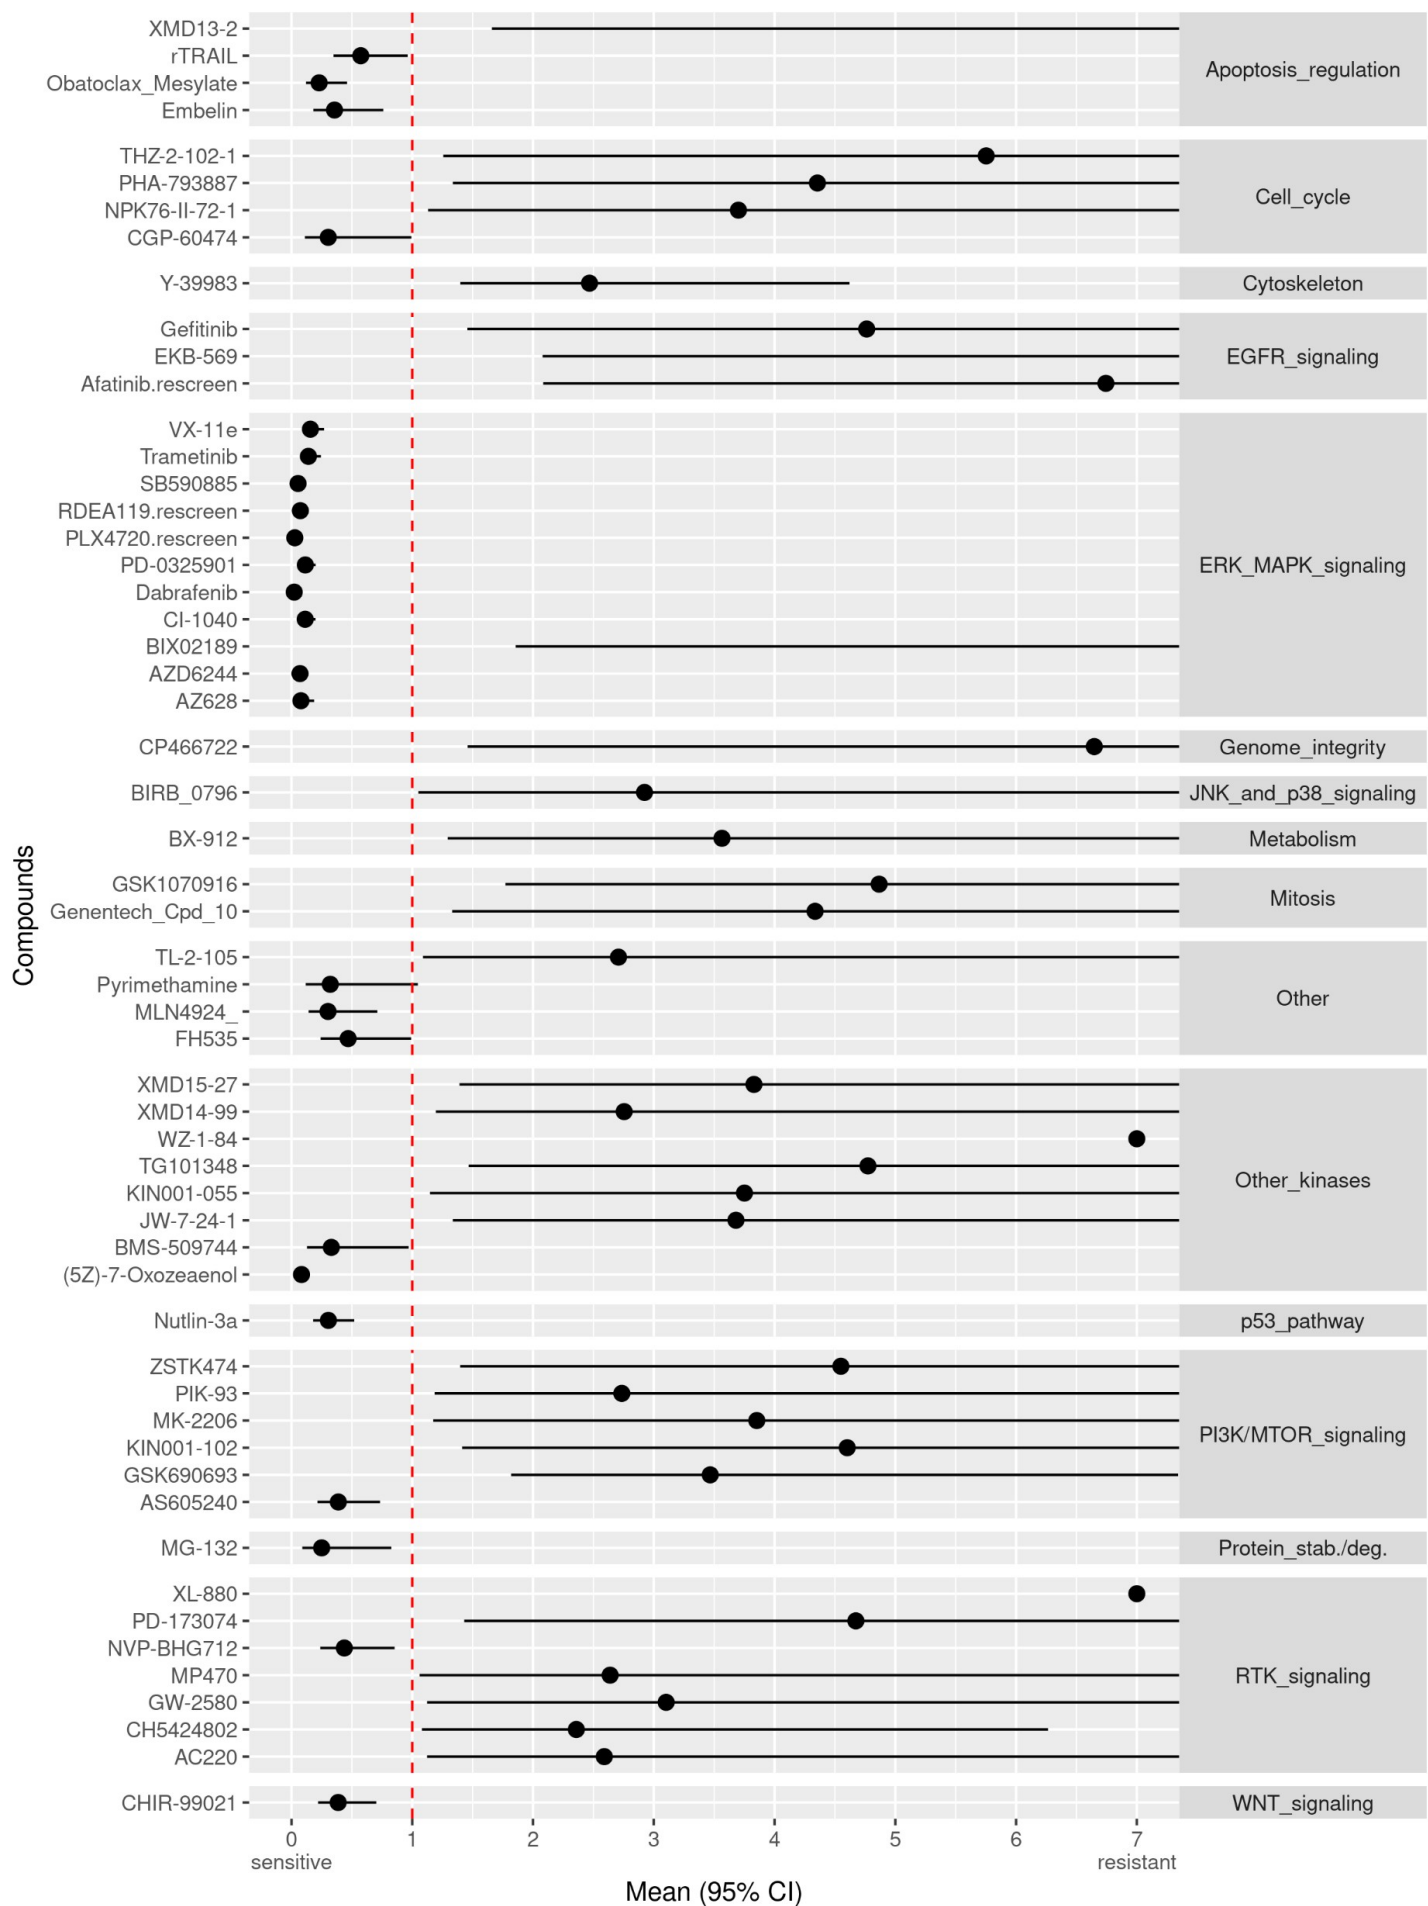

**Supplementary Figure 3.** Associations of drug response to single compounds and BRAFV600 mutations. Forest plot with OR and confidence intervals given for compounds with  $p < 0.05$  (fisher's exact tests). Comparisons with groups of the size zero with infinite confidence intervals are depicted as single points at  $OR = 0$  (sensitive) or  $OR = 7$  (resistant). Analysis performed across entities.



**A*****BRAF* V600**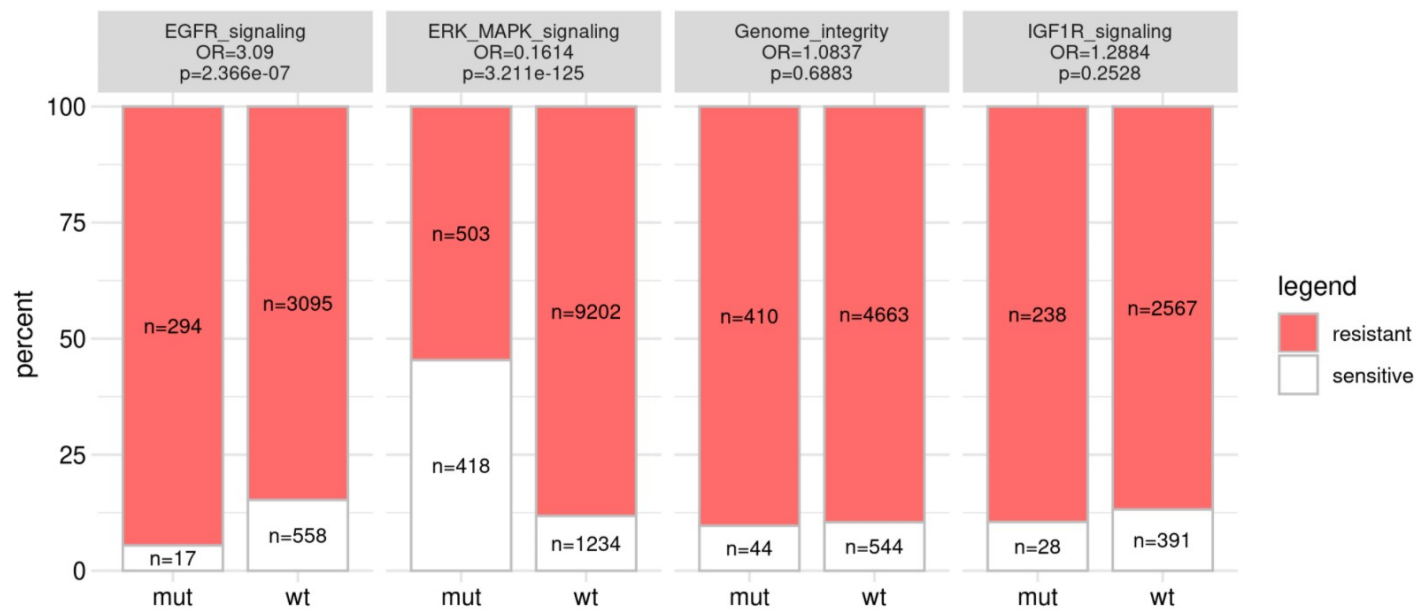**B*****NRAS, HRAS, KRAS* hotspot mutations**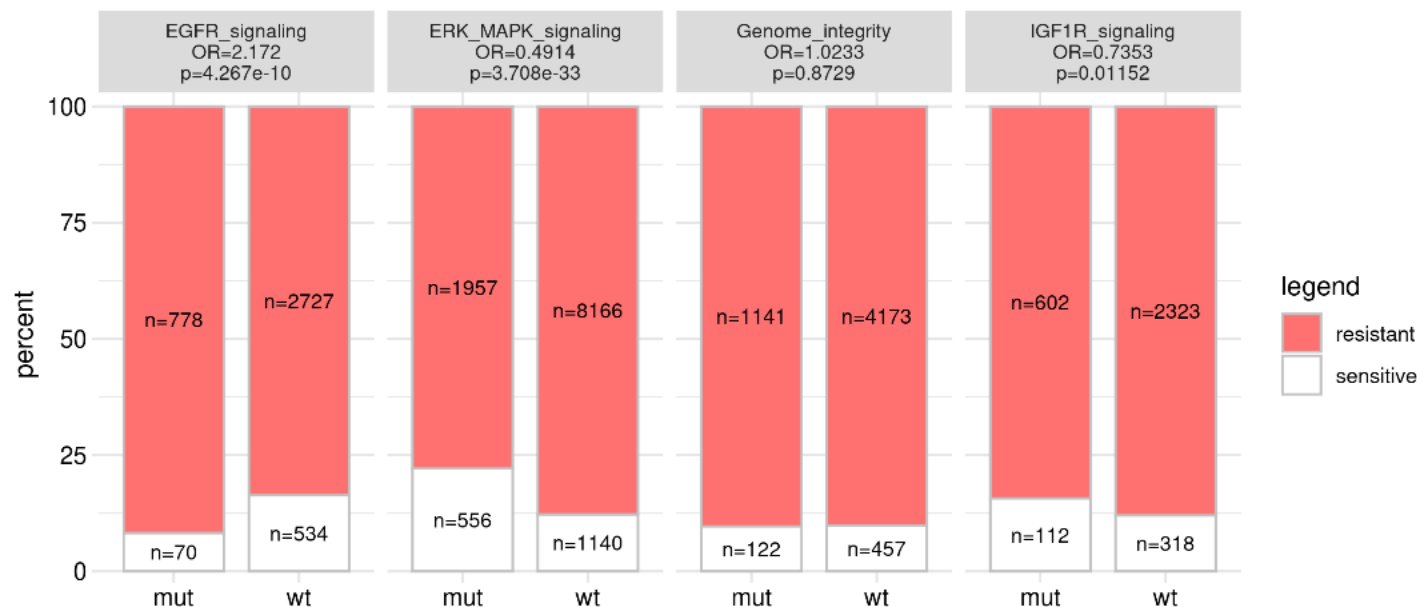

**Supplementary Figure 4.** Cell lines with activating changes in *BRAF* V600 (A) and in *RAS* genes (B) show sensitivity to ERK/MAPK inhibition. For each pathway (grey boxes) two barplots show numbers of cell lines pooled in the changed/mutated group (mut) and in the wild type (wt). Percent of resistant (red) and sensitive (white) cell lines indicated on the y-scale. Odds ratios (OR) for resistance in the altered cell lines above each bar plot: OR >1: resistance of altered cell lines to drugs in this pathway, OR <1: sensitivity.

**A**

| drug_group                    | OR     | fisher_p  | chi_p     | lower  | upper  |
|-------------------------------|--------|-----------|-----------|--------|--------|
| Other_kinases                 | 1.7062 | 6.284E-18 | 1.637E-16 | 1.5033 | 1.944  |
| Other                         | 1.4415 | 4.928E-10 | 1.518E-09 | 1.2813 | 1.6268 |
| PI3K/MTOR_signaling           | 1.547  | 2.377E-08 | 6.958E-08 | 1.3219 | 1.8208 |
| EGFR_signaling                | 0.5125 | 3.045E-08 | 5.1E-09   | 0.4093 | 0.6453 |
| Chromatin_other               | 2.4925 | 7.835E-08 | 4.298E-07 | 1.753  | 3.6651 |
| Cell_cycle                    | 1.8093 | 3.169E-07 | 1.087E-06 | 1.4297 | 2.3241 |
| DNA_replication               | 1.8182 | 1.372E-06 | 3.926E-06 | 1.415  | 2.3747 |
| ERK_MAPK_signaling            | 1.4639 | 4.555E-06 | 7.653E-06 | 1.2407 | 1.7372 |
| Cytoskeleton                  | 1.6085 | 9.924E-06 | 1.556E-05 | 1.2993 | 2.0104 |
| Chromatin_histone_acetylation | 1.5991 | 1.753E-05 | 3.044E-05 | 1.286  | 2.011  |
| p53_pathway                   | 2.3501 | 2.495E-05 | 5.751E-05 | 1.5588 | 3.7104 |
| Metabolism                    | 2.0327 | 2.846E-05 | 7.154E-05 | 1.4407 | 2.9643 |
| Genome_integrity              | 1.8228 | 3.651E-05 | 7.339E-05 | 1.361  | 2.4962 |
| RTK_signaling                 | 1.3427 | 5.285E-05 | 7.49E-05  | 1.1621 | 1.5585 |
| Apoptosis_regulation          | 1.4639 | 0.001347  | 0.00156   | 1.16   | 1.8705 |
| Mitosis                       | 1.4984 | 0.001367  | 0.00174   | 1.1684 | 1.9519 |
| JNK_and_p38_signaling         | 1.5021 | 0.006234  | 0.006583  | 1.1263 | 2.0447 |
| IGF1R_signaling               | 1.3581 | 0.06166   | 0.05772   | 0.9956 | 1.8926 |
| Protein_stab./deg.            | 1.2857 | 0.1425    | 0.1287    | 0.9358 | 1.8121 |
| Chromatin_histone_methylation | 1.4579 | 0.2131    | 0.1678    | 0.8656 | 2.6399 |
| ABL_signaling                 | 1.2925 | 0.4237    | 0.3568    | 0.7552 | 2.3686 |
| WNT_signaling                 | 1.0888 | 0.6632    | 0.6223    | 0.7747 | 1.566  |

**B**

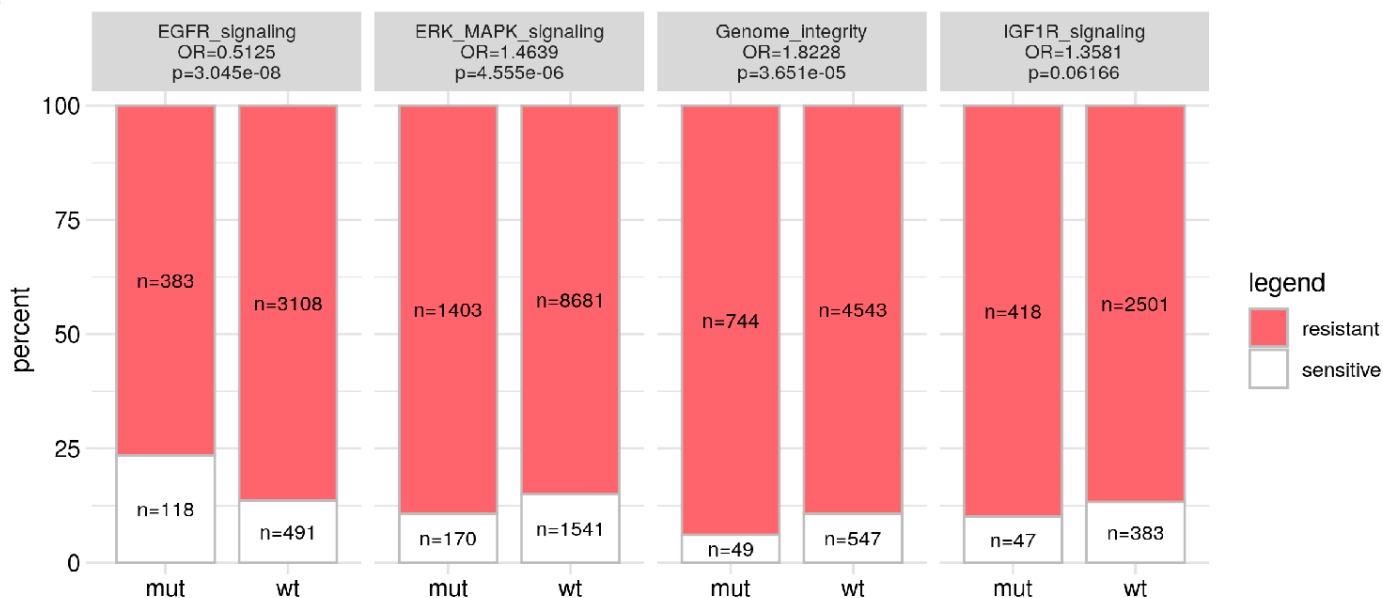

**Supplementary Figure 5.** Cell lines with activating changes in *EGFR* or *ERBB2* show enhanced sensitivity to compounds targeting EGFR signaling. Analysis of activating changes (amplifications, mRNA high z-scores relative to diploid samples with z-score  $\pm 2$ ) across entities. **(A)** Sensitivity to a single pathway is observed with significance (highlighted in yellow) while altered cell lines appear resistant to most drugs from other pathways. **(B)** Odds ratios (OR) for resistance in the altered cell lines shown above each barplot (OR>1 indicates resistance, OR<1 sensitivity).

**A**

| drug_group                    | OR     | fisher_p | chi_p    | lower  | upper  |
|-------------------------------|--------|----------|----------|--------|--------|
| PI3K/MTOR_signaling           | 0.7473 | 3.26E-05 | 1.87E-05 | 0.6547 | 0.8554 |
| IGF1R_signaling               | 1.8572 | 0.00048  | 0.00074  | 1.3048 | 2.7279 |
| EGFR_signaling                | 1.569  | 0.00197  | 0.00225  | 1.1805 | 2.1232 |
| Other                         | 0.8624 | 0.00727  | 0.00646  | 0.7761 | 0.9602 |
| RTK_signaling                 | 0.8696 | 0.04557  | 0.04246  | 0.7611 | 0.9966 |
| DNA_replication               | 1.2712 | 0.04825  | 0.04635  | 1.0075 | 1.6239 |
| Cell_cycle                    | 0.8388 | 0.08006  | 0.07331  | 0.6946 | 1.0197 |
| Chromatin_histone_methylation | 0.6564 | 0.09115  | 0.06961  | 0.4229 | 1.0533 |
| Cytoskeleton                  | 0.8482 | 0.102    | 0.0955   | 0.701  | 1.0317 |
| Other_kinases                 | 1.0789 | 0.1992   | 0.1906   | 0.9636 | 1.211  |
| ERK_MAPK_signaling            | 1.1074 | 0.2082   | 0.2044   | 0.9471 | 1.3007 |
| Apoptosis_regulation          | 0.896  | 0.331    | 0.3273   | 0.7236 | 1.1189 |
| ABL_signaling                 | 1.3101 | 0.4219   | 0.3347   | 0.7634 | 2.4057 |
| Chromatin_histone_acetylation | 1.0859 | 0.4422   | 0.4264   | 0.8873 | 1.34   |
| Protein_stab./deg.            | 0.9001 | 0.481    | 0.4976   | 0.6736 | 1.2242 |
| Chromatin_other               | 0.9378 | 0.6606   | 0.6645   | 0.7113 | 1.2532 |
| p53_pathway                   | 1.0698 | 0.7331   | 0.6865   | 0.7677 | 1.5225 |
| JNK_and_p38_signaling         | 1.0241 | 0.891    | 0.8524   | 0.7862 | 1.3536 |
| WNT_signaling                 | 1.0386 | 0.9282   | 0.8226   | 0.7341 | 1.5039 |
| Metabolism                    | 1.0171 | 0.9395   | 0.8995   | 0.7599 | 1.3865 |
| Genome_integrity              | 1.019  | 0.9481   | 0.8754   | 0.793  | 1.3265 |
| Mitosis                       | 0.9901 | 0.9538   | 0.9402   | 0.7931 | 1.2487 |

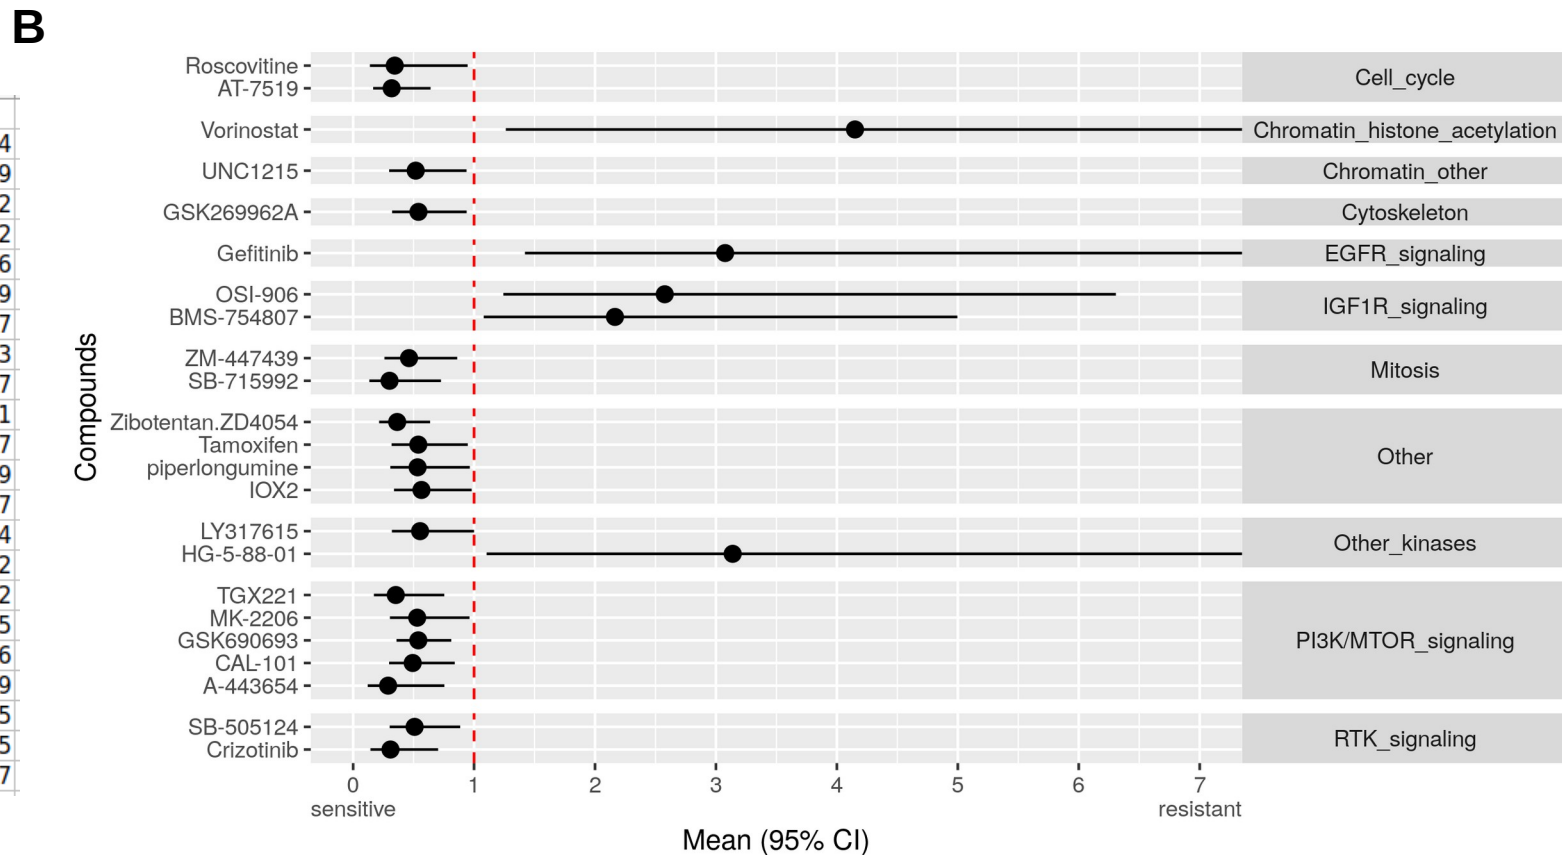

**C**

Top 10 most frequently mutated genes in Breast Invasive Carcinoma (TCGA, Firehose Legacy)

| Mutated Genes (982 profiled samples) |       |     |       |
|--------------------------------------|-------|-----|-------|
| Gene                                 | # Mut | #   | Freq  |
| PIK3CA                               | 355   | 319 | 32.5% |
| TP53                                 | 304   | 301 | 30.7% |
| CDH1                                 | 114   | 112 | 11.4% |
| GATA3                                | 101   | 97  | 9.9%  |
| MAP3K1                               | 98    | 71  | 7.2%  |
| KMT2C                                | 83    | 70  | 7.1%  |
| NCOR1                                | 42    | 40  | 4.1%  |
| PTEN                                 | 37    | 35  | 3.6%  |
| SPEN                                 | 44    | 33  | 3.4%  |
| MAP2K4                               | 32    | 32  | 3.3%  |

**D** Breast Invasive Carcinoma (TCGA Firehose legacy)

| A      | B      | Log2 Odds Ratio | p-Value | q-Value | Tendency           |
|--------|--------|-----------------|---------|---------|--------------------|
| TP53   | GATA3  | 1.604           | <0.001  | <0.001  | Co-occurrence      |
| NCOR1  | MAP2K4 | 1.790           | <0.001  | <0.001  | Co-occurrence      |
| PIK3CA | GATA3  | -1.416          | <0.001  | <0.001  | Mutual exclusivity |
| TP53   | PTEN   | 1.556           | <0.001  | <0.001  | Co-occurrence      |
| PIK3CA | PTEN   | -1.516          | <0.001  | 0.001   | Mutual exclusivity |
| TP53   | CDH1   | -1.505          | <0.001  | 0.002   | Mutual exclusivity |
| GATA3  | PTEN   | 1.331           | <0.001  | 0.002   | Co-occurrence      |
| GATA3  | KMT2C  | 0.926           | 0.006   | 0.029   | Co-occurrence      |
| KMT2C  | NCOR1  | 1.020           | 0.006   | 0.029   | Co-occurrence      |

Cancer Cell Line Encyclopedia (Broad, 2019)

| A      | B      | Log2 Odds Ratio | p-Value | q-Value | Tendency      |
|--------|--------|-----------------|---------|---------|---------------|
| NCOR1  | MAP2K4 | >3              | <0.001  | <0.001  | Co-occurrence |
| TP53   | MAP2K4 | 2.882           | <0.001  | <0.001  | Co-occurrence |
| TP53   | NCOR1  | 1.641           | <0.001  | <0.001  | Co-occurrence |
| GATA3  | PTEN   | 1.213           | <0.001  | <0.001  | Co-occurrence |
| GATA3  | NCOR1  | 1.230           | <0.001  | <0.001  | Co-occurrence |
| MAP3K1 | NCOR1  | 1.260           | <0.001  | <0.001  | Co-occurrence |

**E** CCLE (Broad, 2019), n=921, point mutations, CNV, structural, mRNA, co-occurrence p<0.001, q<0.001

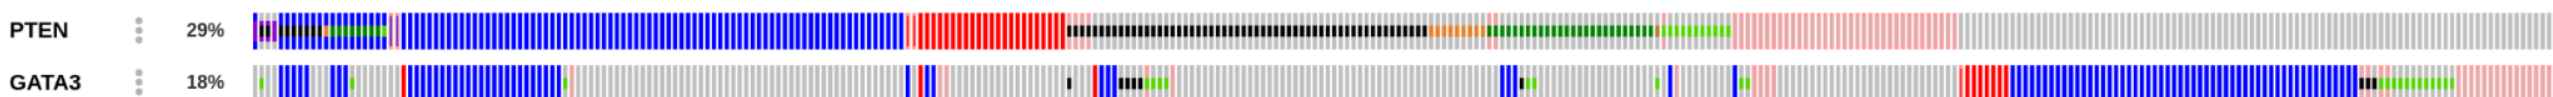

Cancer Cell Line Encyclopedia (Broad, 2019), n=921, point mutations, co-occurrence p<0.001, q<0.001

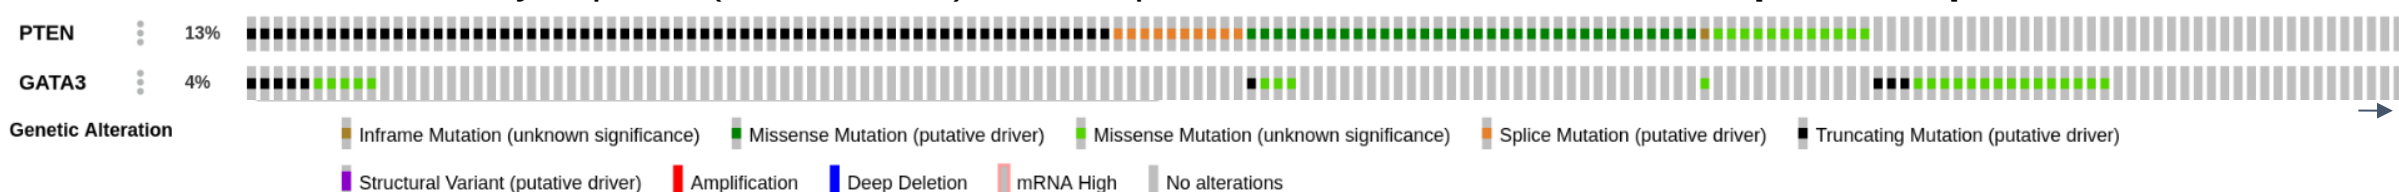

**Supplementary Figure 6. PTEN and GATA3. (A)** Drug sensitivity of the CCLC cell lines associated with deactivating changes (homozygous deletions, splice variants, frameshift and nonsense mutations) in *PTEN*. **(B)** Odds ratios (Fisher's test p<0.05) of significant single compounds. **(C)** Co-mutation of *PTEN* and *GATA3* in breast tumors and cancer cell lines. 10 most frequently mutated genes within Breast Invasive Carcinoma (TCGA, Firehose legacy; point mutations, www.cbioportal.org) and thereof **(D)** significant co-occurrence and mutual exclusivity (point mutations, structural and mRNA alterations) in breast cancer and the CCLE. **(E)** Co-occurrence of *PTEN* and *GATA3* genetic changes in CCLE significant also for point mutations only (excluding structural and mRNA changes to rule out that co-occurrence is based solely on the localization on the same chromosome arm). Arrow indicates the presence of more wild type samples not depicted.
